# Supplementary material for: Anion–cation charge-transfer properties and spectral studies of [M(phen)3][Cd4(SPh)10] (M = Ru, Fe, and Ni)
Source: Royal Society of Chemistry journal article supplement (doi:10.1039/c1dt10860c), 2011-01-01
Supplement: c1dt10860c.pdf [file c1dt10860c.pdf]

## ESI materials for

### Anion-Cation Charge-Transfer Properties and Spectral Studies of [M(phen)<sub>3</sub>][Cd<sub>4</sub>(Sph)<sub>10</sub>] (M = Ru, Fe, and Ni)

Jian-Bing Jiang, Guo-Qing Bian, Ya-Ping Zhang, Wen Luo, Qin-Yu Zhu,\* and Jie Dai\*

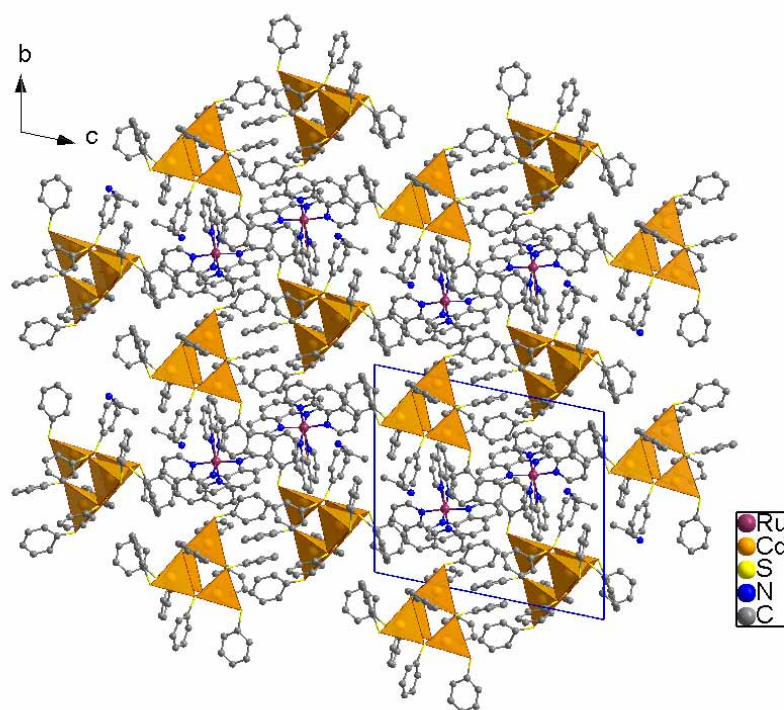

ESI-Fig. 1 Molecular packing of [Ru(phen)<sub>3</sub>][Cd<sub>4</sub>Sph<sub>10</sub>] $\cdot$ CH<sub>3</sub>CN (**1**), showing the crystal cell.

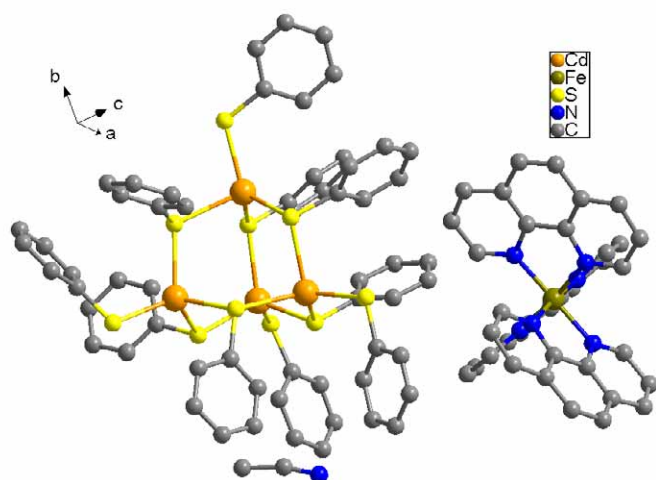

**ESI-Fig. 2** Molecular structure of  $[\text{Fe}(\text{phen})_3][\text{Cd}_4\text{Sph}_{10}]\cdot\text{CH}_3\text{CN}$  (**2**), hydrogen atoms are omitted for clarity.

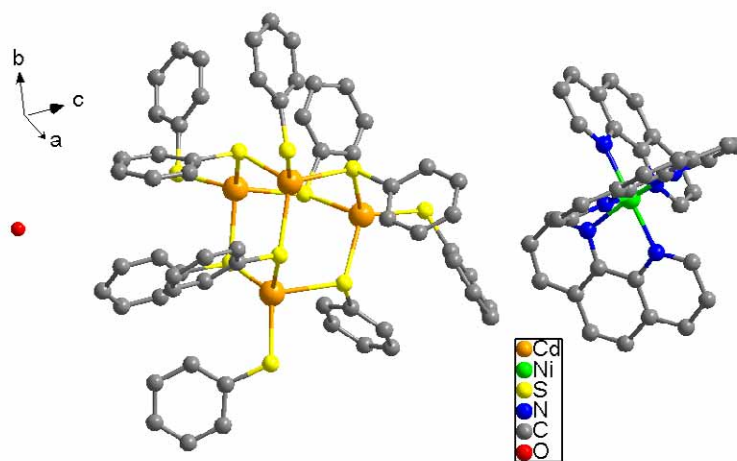

**ESI-Fig. 3** Molecular structure of  $[\text{Ni}(\text{phen})_3][\text{Cd}_4\text{Sph}_{10}]\cdot\text{H}_2\text{O}$  (**3**), hydrogen atoms are omitted for clarity.

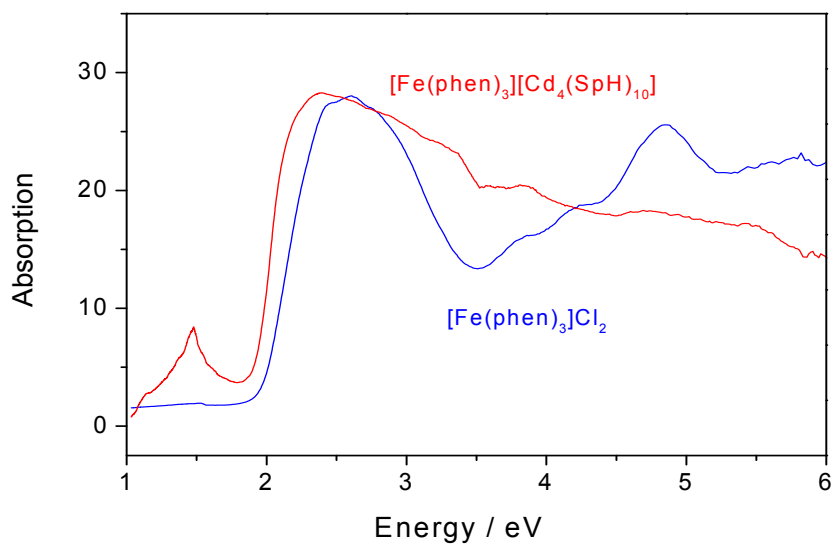

(a)

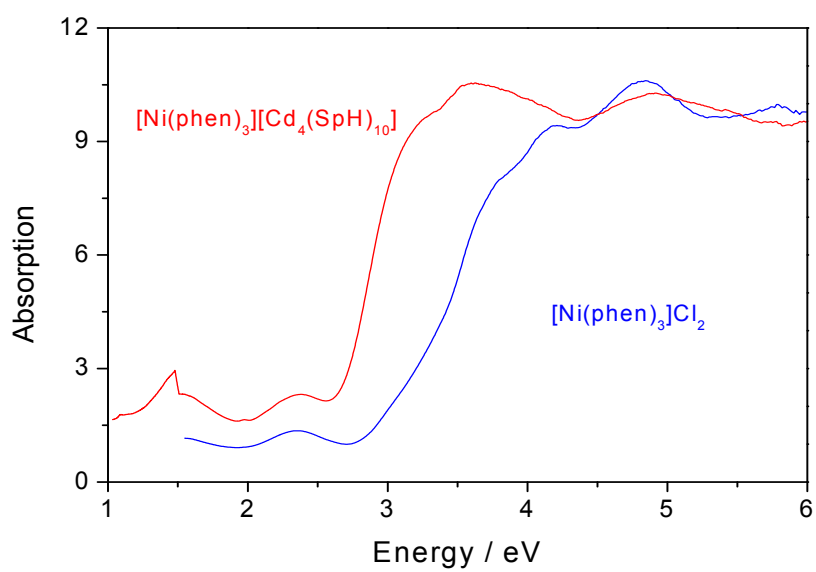

(b)

**ESI-Fig. 4** Solid-state electronic spectra of  $[\text{M}(\text{phen})_3]\text{Cl}_2$  and  $[\text{M}(\text{phen})_3][\text{Cd}_4(\text{SpH})_{10}]$ , (a)  $\text{M} = \text{Fe}(\text{II})$ , (b)  $\text{M} = \text{Ni}(\text{II})$ .

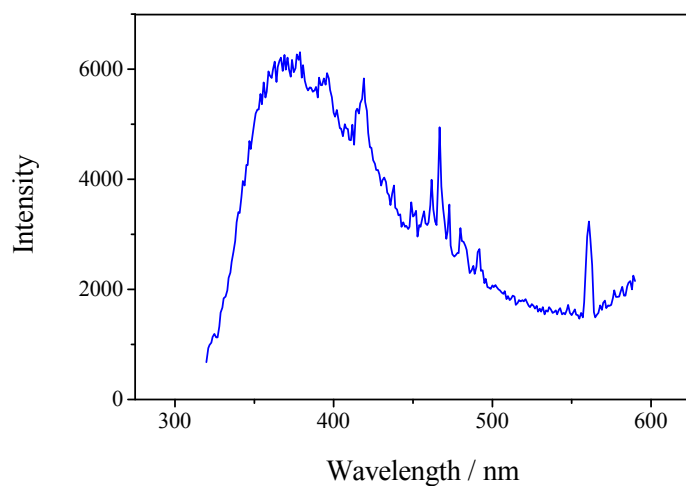

(a)

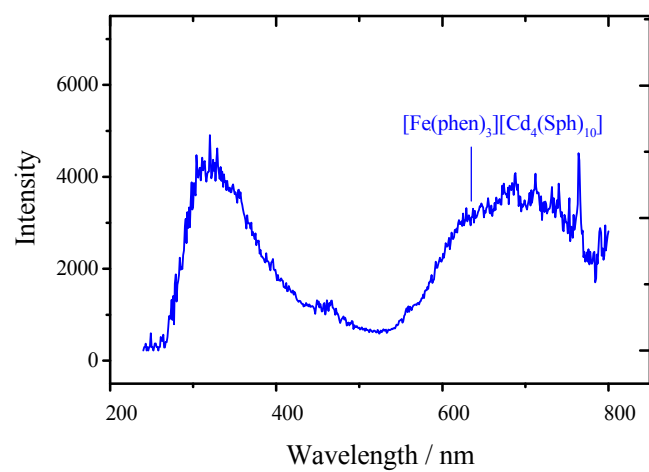

(b)

**ESI-Fig. 5** Fluorescence emission spectra of  $[\text{Me}_4\text{N}]_2[\text{Cd}_4\text{Sph}_{10}]$  (a) and  $[\text{Fe}(\text{phen})_3][\text{Cd}_4\text{Sph}_{10}]$  (b) measured in the solid state.

**ESI-Table 1**      **Calculated results by MP3:**

| (1) [Cd <sub>4</sub> Sph <sub>10</sub> ] <sup>2-</sup> | (2) Fe(phen) <sub>3</sub> Cl <sub>2</sub> | (3) [M(phen) <sub>3</sub> ][Cd <sub>4</sub> (Sph) <sub>10</sub> ] |
|--------------------------------------------------------|-------------------------------------------|-------------------------------------------------------------------|
| <b>Energy:</b>                                         | <b>Energy:</b>                            | <b>Energy:</b>                                                    |
| HOMO-3: E = -4.327053 eV                               | HOMO-3: E = -8.728138 eV                  | HOMO-3: E = -7.05157 eV                                           |
| HOMO-2: E = -4.253053 eV                               | HOMO-2: E = -8.509764 eV                  | HOMO-2: E = -6.85387 eV                                           |
| HOMO-1: E = -4.165588 eV                               | HOMO-1: E = -7.331138 eV                  | HOMO-2: E = -6.634559 eV                                          |
| HOMO: E = -4.130404 eV                                 | HOMO: E = -6.955764 eV                    | HOMO: E = -6.594343 eV                                            |
| <br>                                                   |                                           |                                                                   |
| LUMO: E = 2.675658 eV                                  | LUMO: E = -1.352436 eV                    | LUMO: E = -3.675894 eV                                            |
| LUMO+1: E = 3.733966 eV                                | LUMO+1: E = -1.201955 eV                  | LUMO+1: E = -3.599601 eV                                          |
| LUMO+2: E = 3.783419 eV                                | LUMO+2: E = -0.8432351 eV                 | LUMO+2: E = -3.391407 eV                                          |
| LUMO+3: E = 3.836052 eV                                | LUMO+3: E = -0.7294009 eV                 | LUMO+3: E = -3.303386 eV                                          |

**ESI-Table 2**

|                                                           | $A_s$ | $n_s(\text{acetonitrile})$ | $F_s$      | $Ex$ (nm) | $\varphi_s / \varphi_r$ |
|-----------------------------------------------------------|-------|----------------------------|------------|-----------|-------------------------|
| Ru(phen) <sub>3</sub> Cl <sub>2</sub>                     | 0.793 | 1.344                      | -3.68236E7 | 284       | 2.10                    |
| Ru(phen) <sub>3</sub> Cd <sub>4</sub> (sph) <sub>10</sub> | 0.407 | 1.344                      | -3.41877E7 | 284       |                         |
| Ru(phen) <sub>3</sub> Cl <sub>2</sub>                     | 0.490 | 1.344                      | -9.64033E7 | 420       | 3.62                    |
| Ru(phen) <sub>3</sub> Cd <sub>4</sub> (sph) <sub>10</sub> | 0.190 | 1.344                      | -6.87687E7 | 420       |                         |
